# Supplementary material
Source: ML conference proceedings conference paper supplement (https://proceedings.mlr.press/v37/luo15.html)
Supplement: Supplementary file 1 [file luo15-supp.pdf]

---

## Appendix E: The proof of Theorem 1

*Proof.* Let us consider Problem (6) directly, rewrite it as following

$$\begin{aligned} \min_{\mathbf{W}, b, \zeta} \quad & \frac{1}{2} \text{tr}(\mathbf{W}^T \mathbf{W}) + C \sum_{i=1}^n \zeta_i + \tau \|\mathbf{W}\|_* \quad (19) \\ \text{s.t.} \quad & y_i [\text{tr}(\mathbf{W}^T \mathbf{X}_i) + b] \geq 1 - \zeta_i, \quad i = 1, \dots, n \\ & \zeta_i \geq 0, \quad i = 1, \dots, n. \end{aligned}$$

We construct the following Lagrangian function for (19)

$$\begin{aligned} Q(\mathbf{W}, b, \zeta, \beta, \mu) \quad & (20) \\ = \quad & \frac{1}{2} \text{tr}(\mathbf{W}^T \mathbf{W}) + C \sum_{i=1}^n \zeta_i + \tau \|\mathbf{W}\|_* \\ & - \sum_{i=1}^n \beta_i \{y_i [\text{tr}(\mathbf{W}^T \mathbf{X}_i) + b] - 1 + \zeta_i\} - \sum_{i=1}^n \mu_i \zeta_i. \end{aligned}$$

Letting the first-order derivative of  $Q$  with respect to  $\zeta_i$  be 0, we have

$$\mu_i = C - \beta_i, \quad i = 1, \dots, n. \quad (21)$$

Substituting (21) in (20) to eliminate  $r_i$  and  $\xi_i$ , we obtain

$$\begin{aligned} Q(\mathbf{W}, \alpha) \quad & = \frac{1}{2} \text{tr}(\mathbf{W}^T \mathbf{W}) + \tau \|\mathbf{W}\|_* \\ & - \sum_{i=1}^n \alpha_i [y_i \text{tr}(\mathbf{W}^T \mathbf{X}_i) - 1]. \quad (22) \end{aligned}$$

Since  $\mu_i \geq 0$ ,  $\beta_i$  should satisfy the following condition

$$0 \leq \beta_i \leq C. \quad (23)$$

By KKT condition (Borwein & Lewis, 2010), we also have  $\mathbf{0}$  should be in the subgradient of  $Q$  when the optimal solution is taken:

$$\mathbf{0} \in \partial Q(\tilde{\mathbf{W}}, \tilde{\beta}) \Big|_{\mathbf{W}=\tilde{\mathbf{W}}}. \quad (24)$$

Based on Eqn. (1), we have

$$\tilde{\mathbf{W}} = \mathcal{D}_\tau \left( \sum_{i=1}^n \tilde{\beta}_i y_i \mathbf{X}_i \right),$$

where  $\tilde{\beta}$  is the corresponding value of Lagrangian multiplier when  $\tilde{\mathbf{W}}$  is the optimal solution.  $\square$

$$S^* = \underset{S}{\operatorname{argmax}} E(S) \quad (25)$$

## References

Borwein, Jonathan M and Lewis, Adrian S. *Convex analysis and nonlinear optimization: theory and examples*, volume 3. Springer Science & Business Media, 2010.
